# Supplementary material for: Rheological Behavior and Dynamic Mechanical Properties for Interpretation of Layer Adhesion in FDM 3D Printing
Source: MDPI journal article supplement (doi:10.3390/polym14132721), 2022-07-03
Supplement: s1 [file s1]

Article

# Rheological Behavior and Dynamic Mechanical Properties for Interpretation of Layer Adhesion in FDM 3D Printing

Supaphorn Thumsorn <sup>1,\*</sup>, Wattanachai Prasong <sup>2</sup>, Takashi Kurose <sup>1,3</sup>, Akira Ishigami <sup>1,4</sup>, Yutaka Kobayashi <sup>1</sup> and Hiroshi Ito <sup>1,4,\*</sup>

- <sup>1</sup> Research Center for GREEN Materials and Advanced Processing, Yamagata University, 4-3-16 Jonan, Yonezawa, Yamagata 992-8510, Japan; kurose.takashi@sist.ac.jp (T.K.); akira.ishigami@yz.yamagata-u.ac.jp (A.I.); kobayashi.y@yz.yamagata-u.ac.jp (Y.K.)
  - <sup>2</sup> Department of Industrial Engineering, Faculty of Engineering, Pathumwan Institute of Technology, 833 Rama I Road, Wangmai, Pathumwan, Bangkok 10330, Thailand; wattanachai@pit.ac.th
  - <sup>3</sup> Department of Mechanical Engineering, Faculty of Science and Technology, Shizuoka Institute of Science and Technology, 2200-2 Toyosawa, Fukuroi, Shizuoka 437-8555, Japan
  - <sup>4</sup> Graduate School of Organic Materials Science, Yamagata University, 4-3-16 Jonan, Yonezawa, Yamagata 992-8510, Japan
- \* Correspondence: thumsorn@yz.yamagata-u.ac.jp (S.T.); ihiroshi@yz.yamagata-u.ac.jp (H.I.); Tel: +81-(23)-8263081 (H.I.)

**Citation:** Thumsorn, S.; Prasong, W.; Kurose, T.; Ishigami, A.; Kobayashi, Y.; Ito, H. Rheological Behavior and Dynamic Mechanical Properties for Interpretation of Layer Adhesion in FDM 3D Printing. *Polymers* **2022**, *14*, 2721. <https://doi.org/10.3390/polym14132721>

Academic Editors: Andrea Sorrentino

Received: 5 June 2022

Accepted: 1 July 2022

Published: 3 July 2022

**Publisher's Note:** MDPI stays neutral with regard to jurisdictional claims in published maps and institutional affiliations.

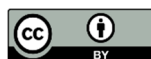

**Copyright:** © 2022 by the authors. Licensee MDPI, Basel, Switzerland. This article is an open access article distributed under the terms and conditions of the Creative Commons Attribution (CC BY) license (<https://creativecommons.org/licenses/by/4.0/>).

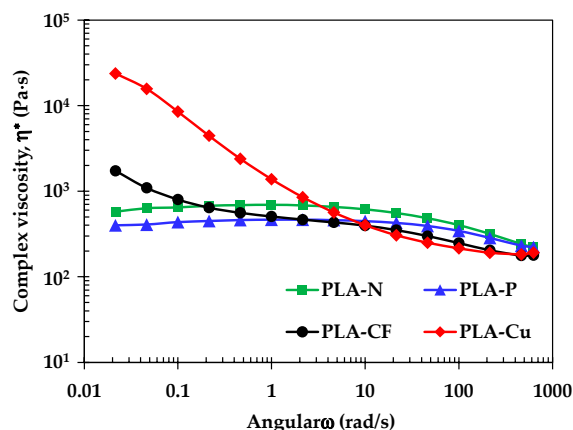

**Figure S1.** Complex viscosity as a function of angular frequency of PLA filaments.

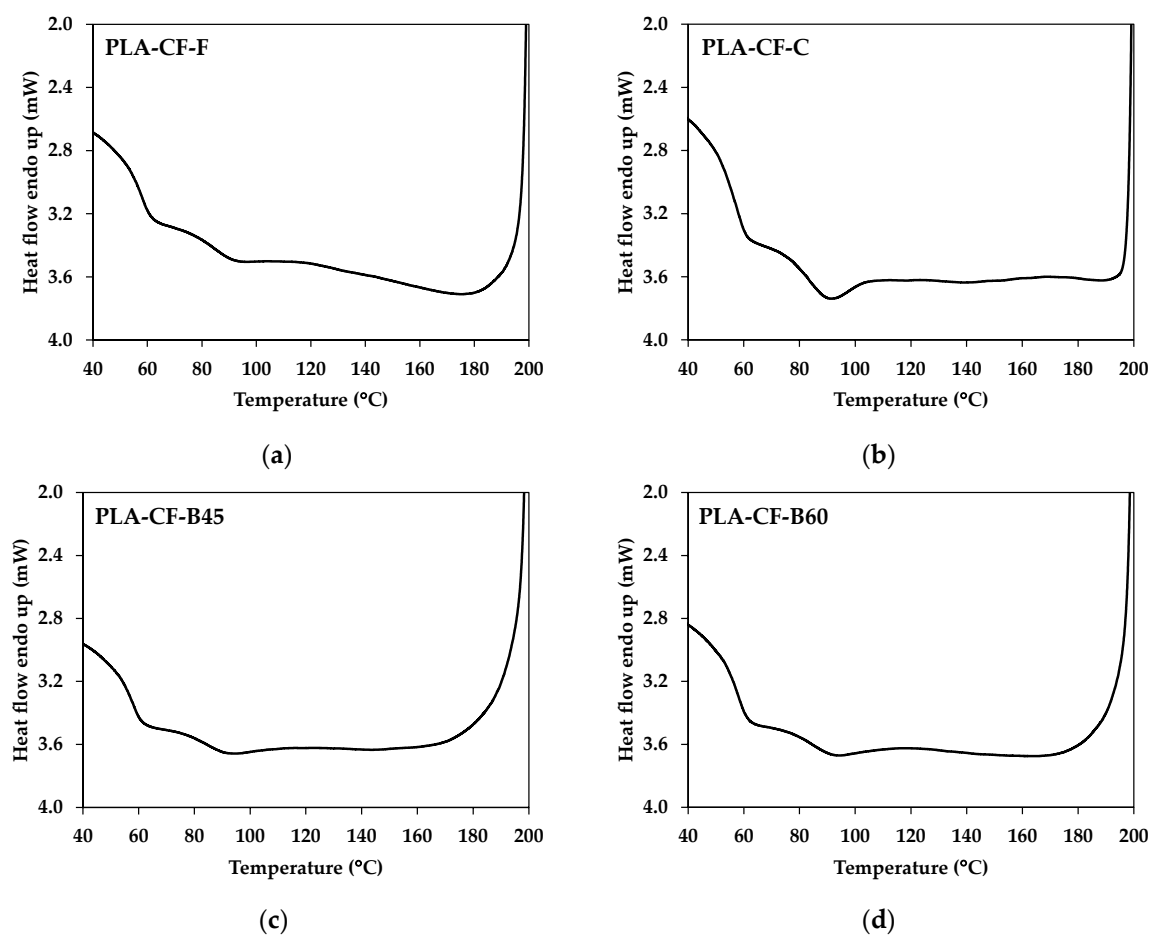

**Figure S2.** DSC thermograms of the enlarging cooling cycles of PLA-CF samples: (a) PLA-CF-F; (b) PLA-CF-C; (c) PLA-CF-B45; (d) PLA-CF-B60.

## Density Measurement

Densities of samples were carried out by a gas displacement pycnometer (Micromeritics AccuPyc II 1345, Micromeritics Instrument Corporation, Norcross, GA, USA). The sample about 0.5–1.0 g was put in the sample cap. The densities of the samples were measured at room temperature under helium atmosphere.

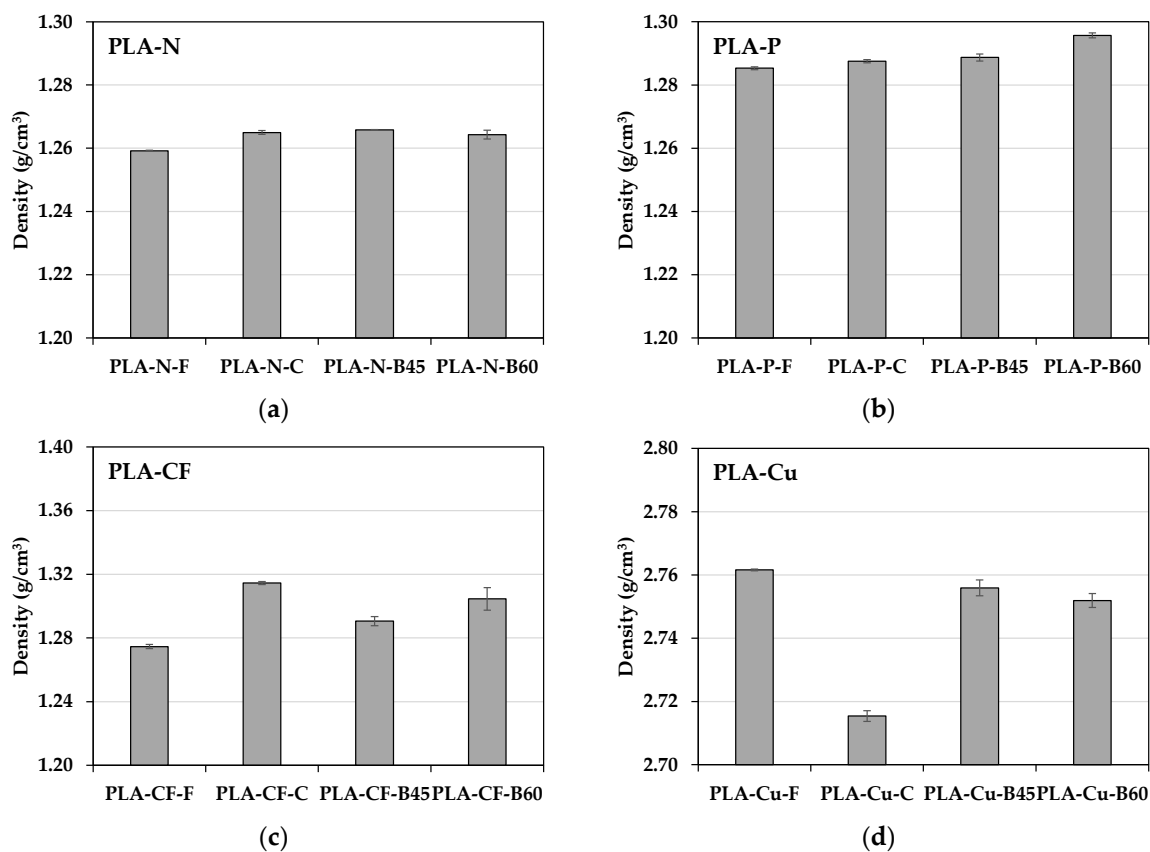

**Figure S3.** Density of samples: (a) PLA-N; (b) PLA-P; (c) PLA-CF; (d) PLA-Cu.
